# Supplementary material for: Design of a Novel Gene Therapy Construct to Achieve Sustained Brain-Derived Neurotrophic Factor Signaling in Neurons
Source: PubMed Central journal article supplement (PMC6066195; doi:10.1089/hum.2017.069), 2018-07-01
Supplement: Supp_Fig1.pdf [file Supp_Fig1.pdf]

# Supplementary Data

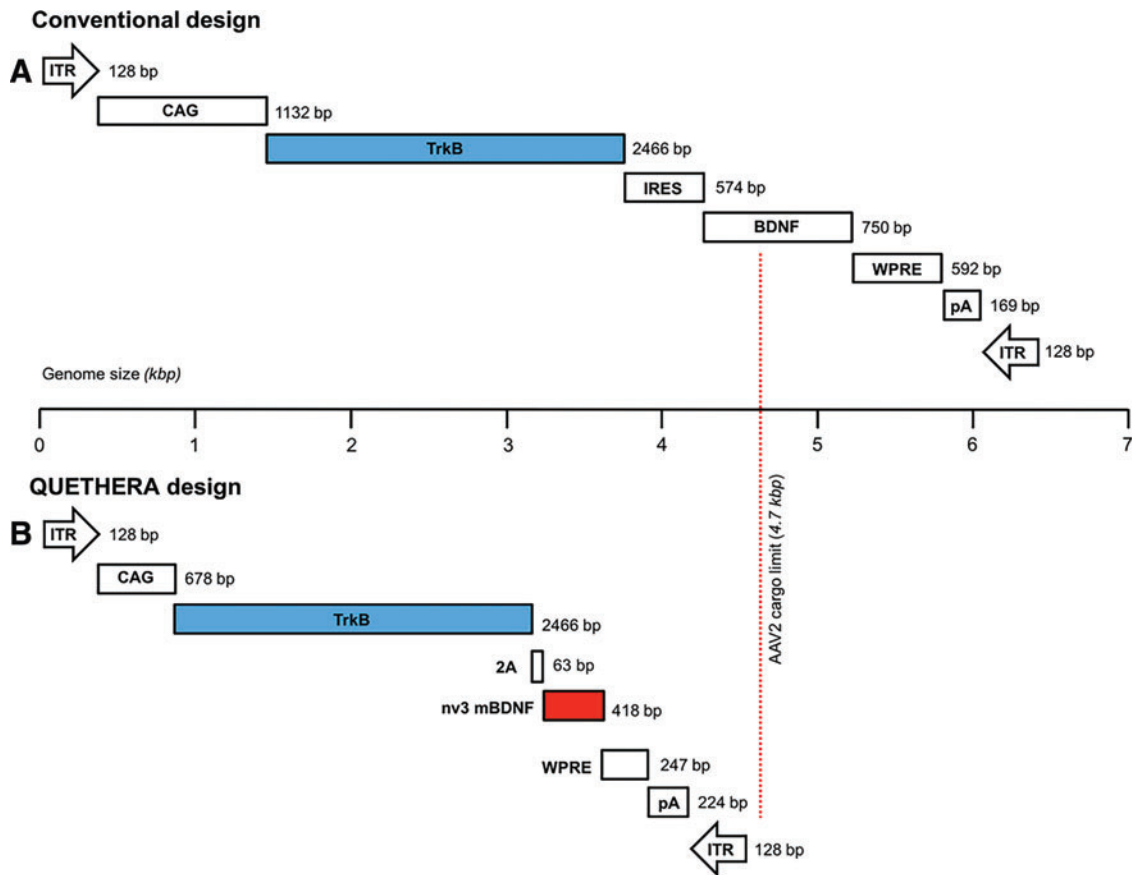

**Supplementary Figure S1.** (A) Schematic representation of the conventional elements necessary for production of TrkB and BDNF in an AAV2 vector system. (B) Schematic representation of elements used in the novel AAV2 TrkB-2A-mBDNF construct tested in this study. BDNF, brain-derived neurotrophic factor; ITR, inverted terminal repeat; IRES, Internal Ribosome Entry Site; mBDNF, mature BDNF; WPRE, woodchuck hepatitis virus posttranscriptional regulatory element; pA, polyadenylation sequence.
