# Supplementary material for: Design of a Novel Gene Therapy Construct to Achieve Sustained Brain-Derived Neurotrophic Factor Signaling in Neurons
Source: PubMed Central journal article supplement (PMC6066195; doi:10.1089/hum.2017.069), 2018-07-01
Supplement: Supp_Fig3.pdf [file Supp_Fig3.pdf]

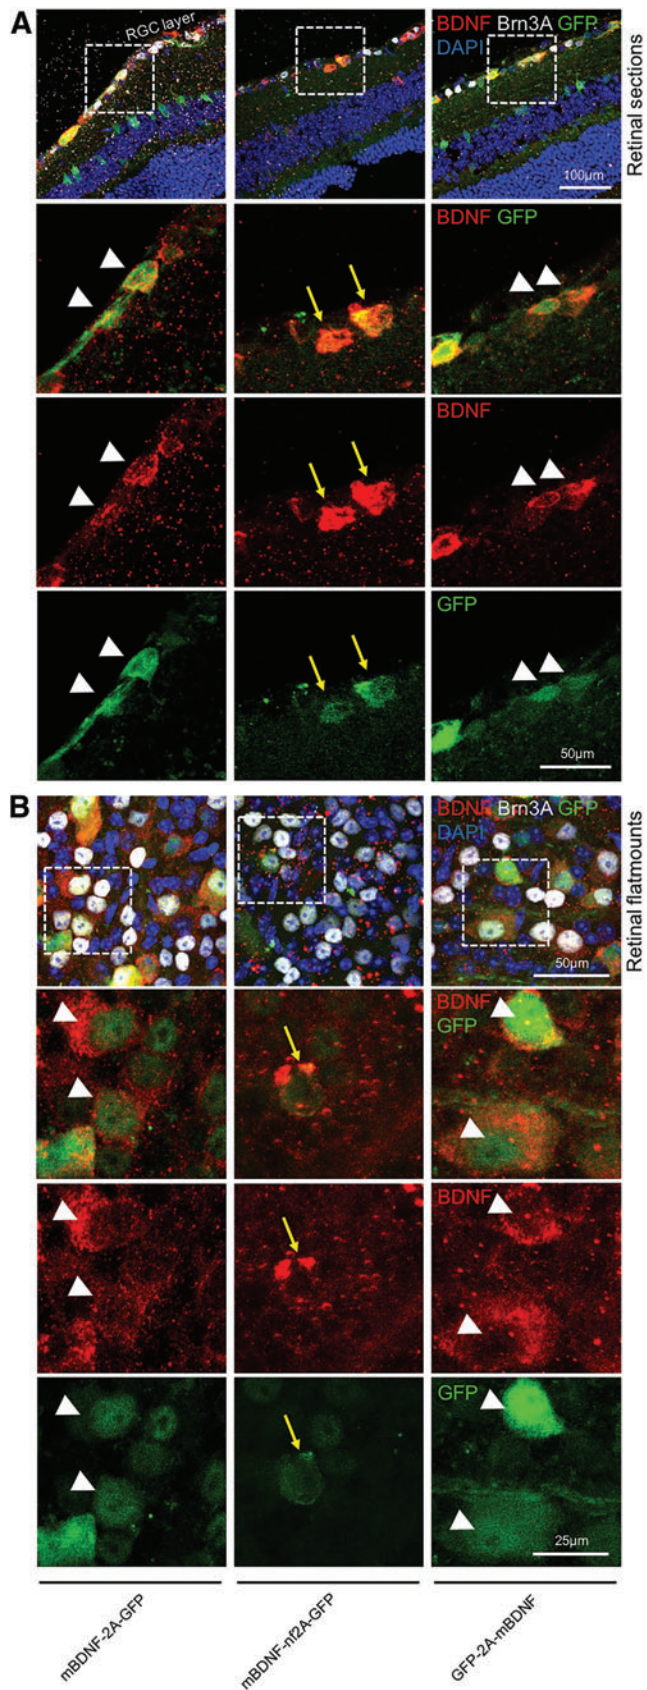

**Supplementary Figure S3.** Cleavage and separation of GFP and BDNF *in vivo* in the mouse retina 3 weeks after AAV2 vector transfection. **(A and B)** GFP and BDNF could be detected in separate locations (*white arrows*) when the 2A viral linker was functional, while use of a non-functional cleavage site did not separate proteins (*yellow arrows*). All AAV2 vectors used at  $1 \times 10^{10}$  viral particles (vp)/eye.
