# Supplementary material for: Design of a Novel Gene Therapy Construct to Achieve Sustained Brain-Derived Neurotrophic Factor Signaling in Neurons
Source: PubMed Central journal article supplement (PMC6066195; doi:10.1089/hum.2017.069), 2018-07-01
Supplement: Supp_Fig4.pdf [file Supp_Fig4.pdf]

*In Vitro* (plasmid)

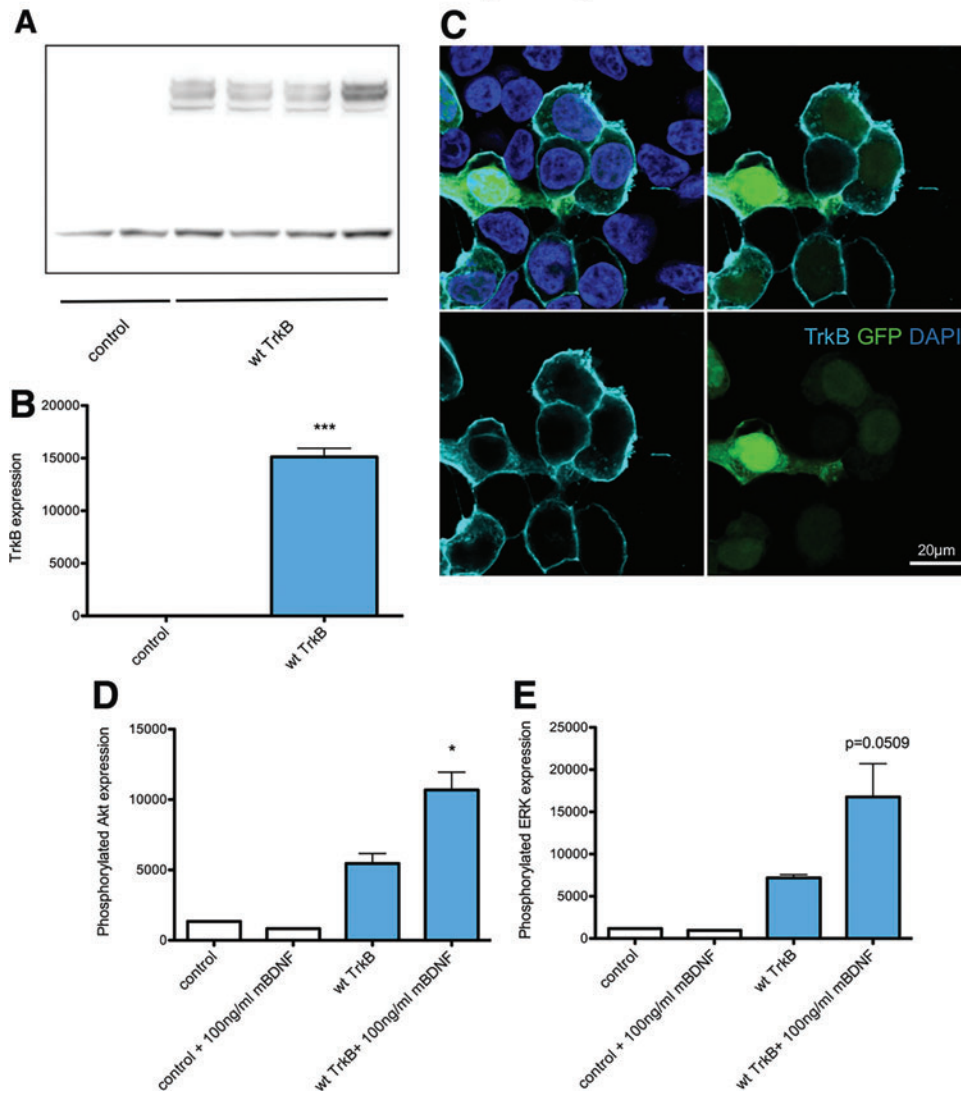

**Supplementary Figure S4.** Independent testing of HEK293 cells transduced with wt TrkB ensured the transgene for TrkB was correct and functional prior to incorporation into construct TrkB-2A-mBDNF. **(A and B)** HEK293 cells expressed TrkB protein 24 h after transduction with wt TrkB ( $n=4$ );  $p < 0.001$  compared to control. **(C)** Expression of the TrkB receptor was observed around the cell membrane of transduced, GFP-positive cells. **(D and E)** Downstream activation could be detected after administering recombinant mBDNF for 4 h to TrkB expressing HEK293 cells ( $n=4$ ); \* $p < 0.05$  compared to wt TrkB. TrkB, tropomyosin-related receptor-B.
